# Supplementary material
Source: publisher site journal article supplement (https://www.dovepress.com/article/207743)
Supplement: Supplementary file 1 [file get_supplementary_file.php]

---

**An update systematic review with  
meta-analysis of randomised trials on  
topical ciclosporin A for dry eye  
disease**

**(Online Supplementary File)**

---

# Index of Online Supplementary Files

**Online Supplementary File 1** Data source and search strategy

**Online Supplementary File 2** Risk of bias

**Online Supplementary File 3** Forest plot of TBUT at baseline

**Online Supplementary File 4** Forest plot of Schirmer's test score at baseline

**Online Supplementary File 5** Forest plot of Fluorescein staining score at baseline

**Online Supplementary File 6** Forest plot of OSDI at baseline

**Online Supplementary File 7** Subset analysis of TBUT by treatment duration

**Online Supplementary File 8** Subset analysis of TBUT by regimen

**Online Supplementary File 9** Meta-regression of TBUT by mean age

**Online Supplementary File 10** Sensitivity analysis of TBUT

**Online Supplementary File 11** Small study bias of TBUT

**Online Supplementary File 12** Subset analysis of Schirmer's test score by treatment duration

**Online Supplementary File 13** Subset analysis of Schirmer's test score by type of test

**Online Supplementary File 14** Subset analysis of Schirmer's test score by regimen

**Online Supplementary File 15** Meta-regression of Schirmer's test score by mean age

**Online Supplementary File 16** Small study bias of Schirmer's test score

**Online Supplementary File 1**  
**Data source and search strategy**

# Online Supplementary File 1

## Data source and search strategy (Cochrane database & Embase)

| Database (n)            | Search strategy                                                                                                                                                                                                                                                                                                                                                                                                                                                                                                                                                                                                                                                                                                                                                                                                                                                                                                                                                                                                                                                                                                                                                                                                                                                                                                                                                               |
|-------------------------|-------------------------------------------------------------------------------------------------------------------------------------------------------------------------------------------------------------------------------------------------------------------------------------------------------------------------------------------------------------------------------------------------------------------------------------------------------------------------------------------------------------------------------------------------------------------------------------------------------------------------------------------------------------------------------------------------------------------------------------------------------------------------------------------------------------------------------------------------------------------------------------------------------------------------------------------------------------------------------------------------------------------------------------------------------------------------------------------------------------------------------------------------------------------------------------------------------------------------------------------------------------------------------------------------------------------------------------------------------------------------------|
| Cochrane (n = 12)       | (conjunctivitis sicca OR keratoconjunctivitis sicca OR keratitis sicca OR Dry Eye Disease OR Dry eye syndrome OR Dry eye OR cornea xerosis OR corneal xerosis) and (ciclosporin A OR ciclosporine OR cyclosporine OR cyclosporin OR CsA) and (artificial tear OR artificial tears OR lubricant eye drop OR lubricant eye drops)                                                                                                                                                                                                                                                                                                                                                                                                                                                                                                                                                                                                                                                                                                                                                                                                                                                                                                                                                                                                                                               |
| Embase (n = 420)        | ('dry eye'/exp OR 'conjunctivitis sicca' OR 'cornea xerosis' OR 'dry eye' OR 'dry eye syndrome' OR 'dry eye syndromes' OR 'xerosis conjunctivae' OR 'dry eye disease' OR 'keratoconjunctivitis sicca'/exp OR 'keratitis sicca' OR 'keratoconjunctivitis sicca' OR 'keratoconjunctivitis sicca' OR 'corneal xerosis') AND ('cyclosporin a'/exp OR 'adi 628' OR 'adi628' OR 'cicloral' OR 'ciclosporin' OR 'ciclosporin a' OR 'ciclosporine' OR 'consupren' OR 'cyclokat' OR 'cyclosporin a' OR 'cyclosporin neoral' OR 'cyclosporine a' OR 'equoral' OR 'gengraf' OR 'ikervis' OR 'iminoral' OR 'neoral' OR 'neoral-sandimmun' OR 'nova 22007' OR 'nova22007' OR 'ol 27400' OR 'ol27400' OR 'pulminiq' OR 'restasis' OR 'sandimmun' OR 'sandimmun neoral' OR 'sandimmune' OR 'sandimmune neoral' OR 'sandimun' OR 'sandimun neoral' OR 'sandimune' OR 'sang 35' OR 'sang35' OR 'sangcya' OR 'vekacia' OR ciclosporine OR ciclosporin OR cyclosporine OR 'cyclosporin'/exp OR 'cipol' OR 'cipol-n' OR 'cyclosporin' OR 'cyclosporine' OR 'deximune' OR 'implanta' OR 'imusporin' OR csa) AND ('artificial tear'/exp OR 'artificial tear' OR 'artificial tears' OR 'confort' OR 'contears' OR 'lubricant eye drops' OR 'lubricating eye drops' OR 'ocular lubricant' OR 'ocular lubricants' OR 'optive' OR 'refresh (drug)' OR 'refresh plus' OR 'tear, artificial' OR 'unisol') |
| PubMed (n = 104)        | (conjunctivitis sicca OR keratoconjunctivitis sicca OR keratitis sicca OR Dry Eye Disease OR Dry eye syndrome OR Dry eye OR cornea xerosis OR corneal xerosis) AND (ciclosporin A OR ciclosporine OR cyclosporine OR cyclosporin OR CsA) AND (artificial tear OR artificial tears OR lubricant eye drop OR lubricant eye drops)                                                                                                                                                                                                                                                                                                                                                                                                                                                                                                                                                                                                                                                                                                                                                                                                                                                                                                                                                                                                                                               |
| Scopus (n = 8)          | (conjunctivitis sicca OR keratoconjunctivitis sicca OR keratitis sicca OR Dry Eye Disease OR Dry eye syndrome OR Dry eye OR cornea xerosis OR corneal xerosis) AND (ciclosporin A OR ciclosporine OR cyclosporine OR cyclosporin OR CsA) AND (artificial tear OR artificial tears OR lubricant eye drop OR lubricant eye drops)                                                                                                                                                                                                                                                                                                                                                                                                                                                                                                                                                                                                                                                                                                                                                                                                                                                                                                                                                                                                                                               |
| Web of Science (n = 98) | TOPIC:((conjunctivitis sicca OR keratoconjunctivitis sicca OR keratitis sicca OR Dry Eye Disease OR Dry eye syndrome OR Dry eye OR cornea xerosis OR corneal xerosis)) AND TOPIC: ((ciclosporin A OR ciclosporine OR cyclosporine OR cyclosporin OR CsA)) AND TOPIC:((artificial tear OR artificial tears OR lubricant eye drop OR lubricant eye drops))                                                                                                                                                                                                                                                                                                                                                                                                                                                                                                                                                                                                                                                                                                                                                                                                                                                                                                                                                                                                                      |

**Online Supplementary File 2**  
**Risk of bias**

# Online Supplementary File 3

## Risk of bias

| Trial                   | Bias 1  | Bias 2  | Bias 3  | Bias 4 | Bias 5 | Bias 6  | Bias 7  |
|-------------------------|---------|---------|---------|--------|--------|---------|---------|
| Altıparmak et al. 2009  | Unclear | Unclear | Unclear | Low    | Low    | Low     | Low     |
| Demiryay et al. 2011    | Unclear | Unclear | High    | Low    | Low    | Unclear | Low     |
| Kim et al. 2009         | Low     | Low     | High    | High   | High   | Low     | Low     |
| Perry et al. 2006       | Low     | Unclear | Low     | Low    | High   | Low     | Low     |
| Prabhasawat et al. 2012 | Low     | Unclear | High    | Low    | Low    | Low     | Low     |
| Rao et al. 2010         | Low     | Low     | Low     | Low    | High   | Low     | Low     |
| Salib et al. 2006       | Low     | Unclear | Low     | Low    | Low    | Unclear | Low     |
| Schechter et al. 2009   | Low     | Low     | Low     | Low    | Low    | Unclear | Low     |
| Willen et al. 2008      | Unclear | Low     | Low     | Low    | Low    | Low     | Low     |
| Wu et al. 2009          | Unclear | High    | High    | High   | Low    | Unclear | Unclear |
| Yang et al. 2016        | Unclear | Unclear | High    | High   | Low    | Unclear | Unclear |

Bias 1, sequence generation.

Bias 2, allocation concealment.

Bias 3, blinding of participants and personnel.

Bias 4, blinding of outcome assessment.

Bias 5, incomplete outcome data.

Bias 6, selective reporting.

Bias 7, other source of bias.

**Online Supplementary File 3-6**  
**Baseline**

# Online Supplementary File 3

## Forest plot of baseline TBUT

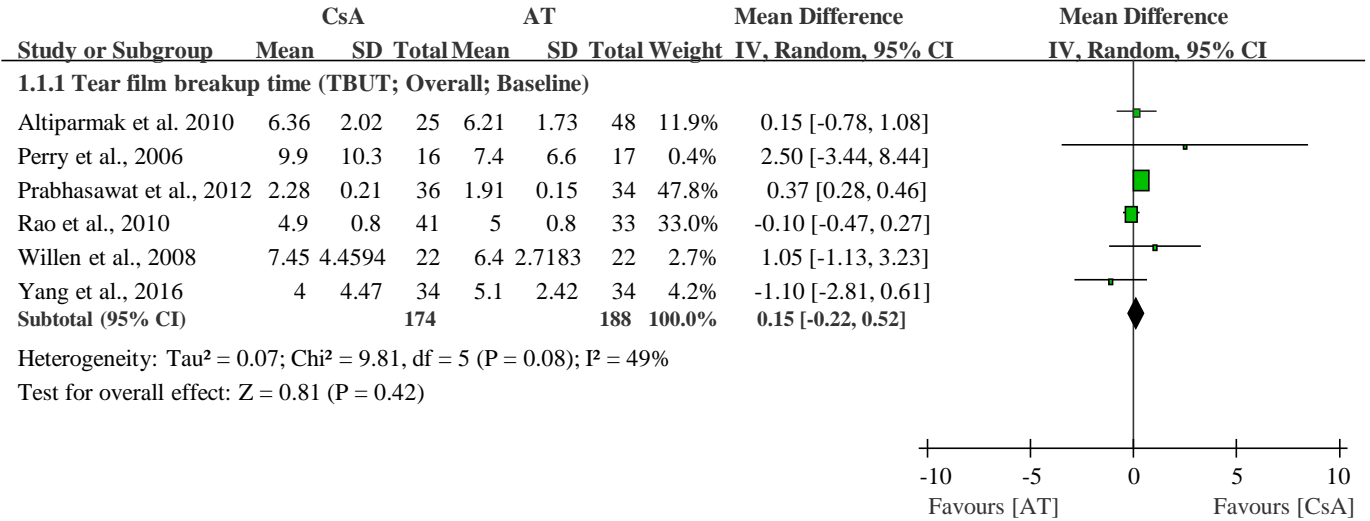

AT, artificial tears; CI, confidence interval; CsA, cyclosporine A; IV, inverse variance; SD, standard deviation.



# Online Supplementary File 4

## Forest plot of baseline Schirmer's test score

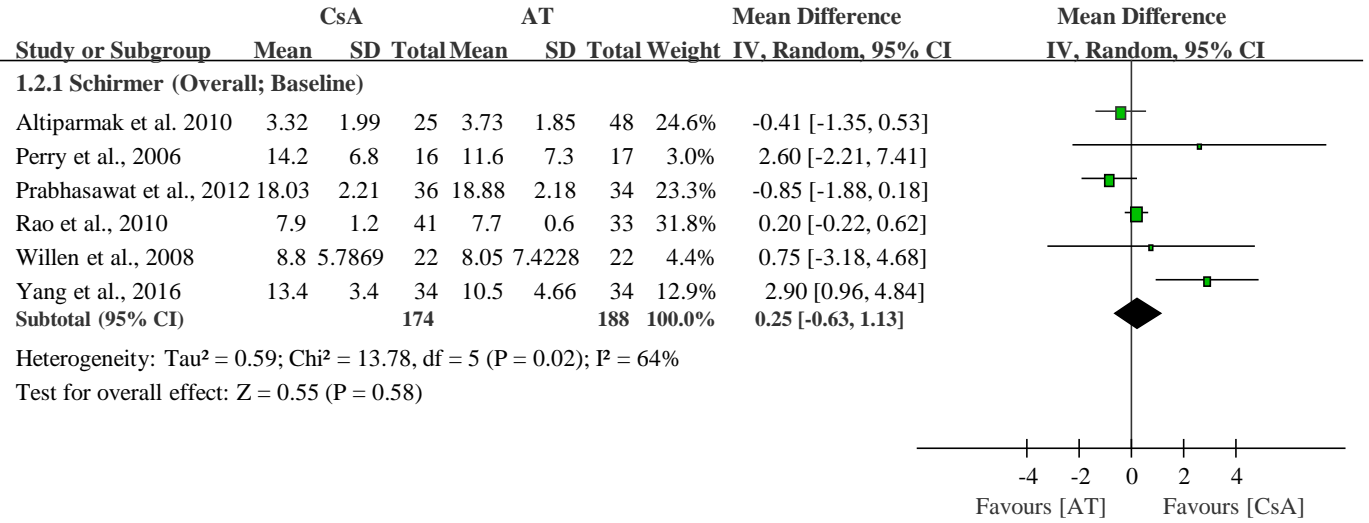

AT, artificial tears; CI, confidence interval; CsA, cyclosporine A; IV, inverse variance; SD, standard deviation.

# Online Supplementary File 5

## Forest plot of baseline Fluorescein staining score

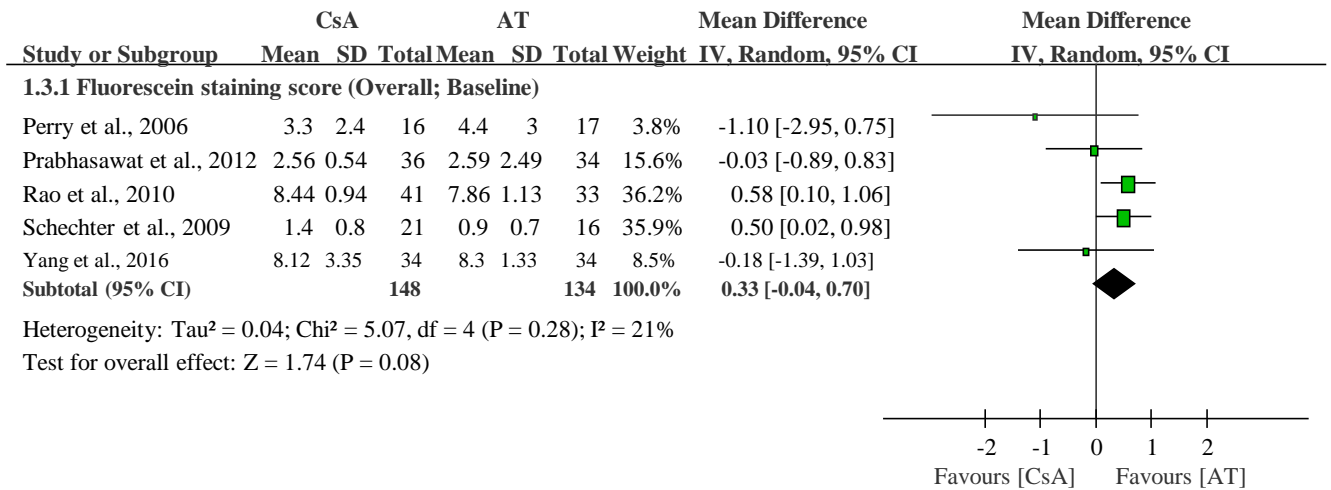

AT, artificial tears; CI, confidence interval; CsA, cyclosporine A; IV, inverse variance; SD, standard deviation.

# Online Supplementary File 6

## Forest plot of baseline OSDI score

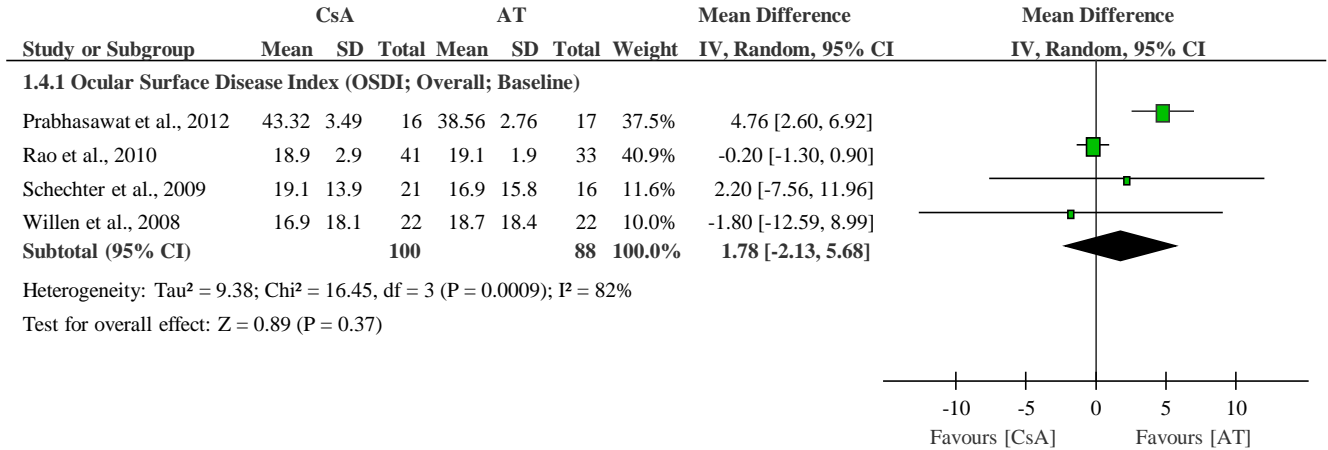

AT, artificial tears; CI, confidence interval; CsA, cyclosporine A; IV, inverse variance; SD, standard deviation.

**Online Supplementary File 7-11**  
**Further analysis of Tear breakup time (TBUT)**

# Online Supplementary File 7

## Subset analysis of TBUT by treatment duration

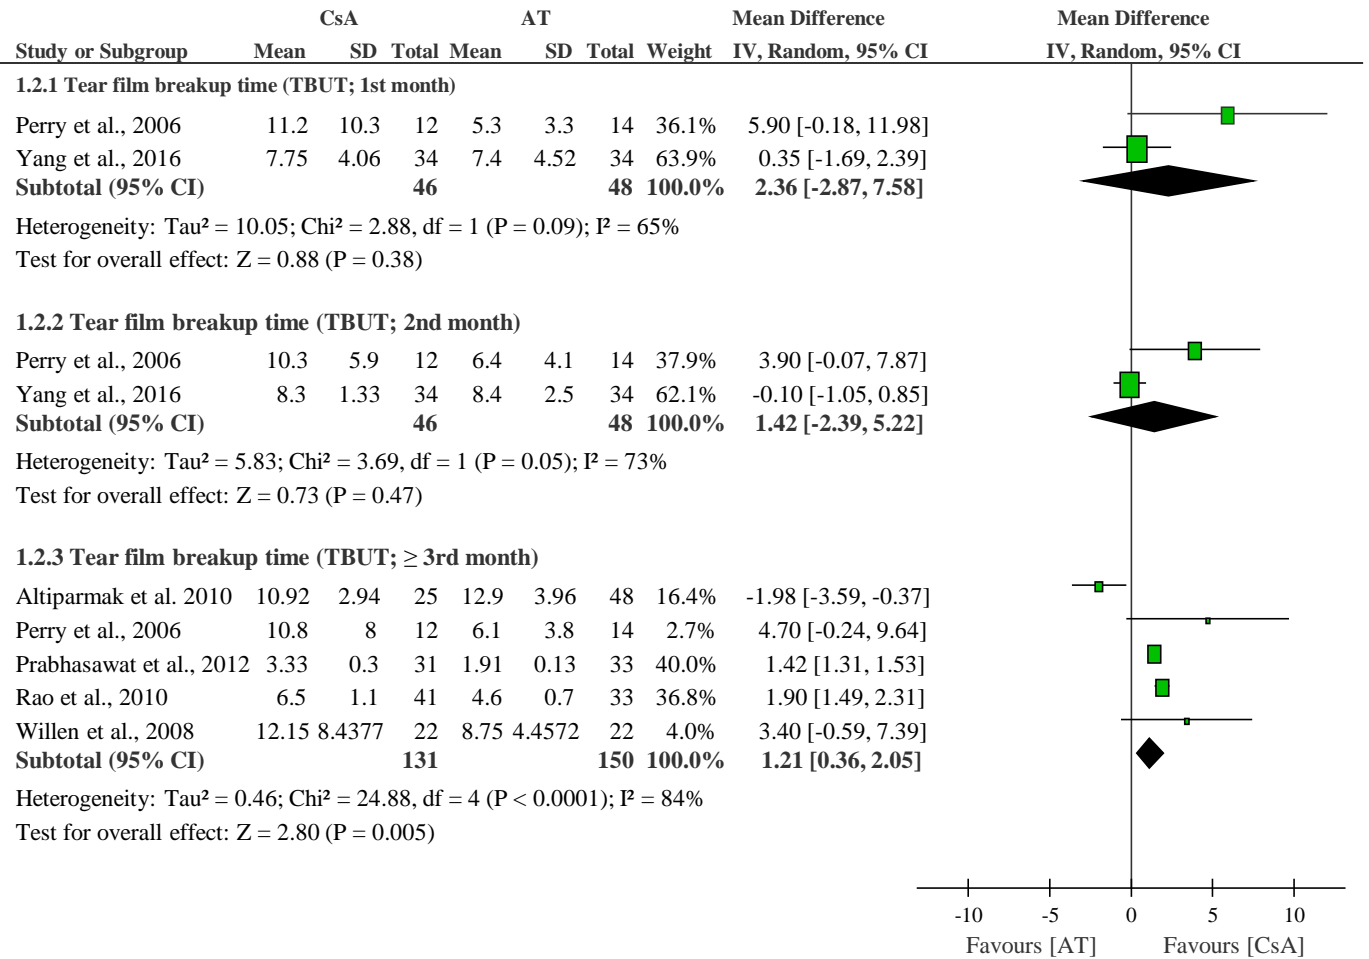

AT, artificial tears; CI, confidence interval; CsA, cyclosporine A; IV, inverse variance; SD, standard deviation.

# Online Supplementary File 8

## Subset analysis of TBUT by regimen

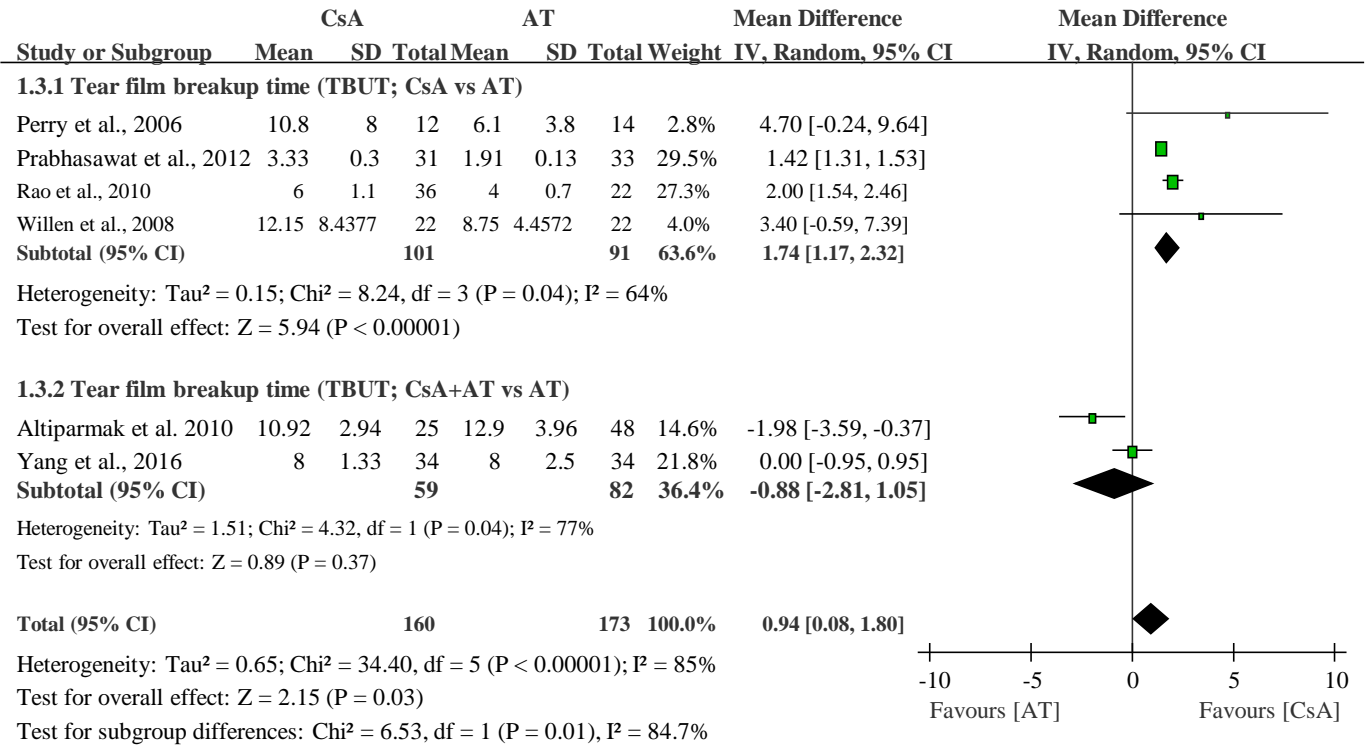

AT, artificial tears; CI, confidence interval; CsA, cyclosporine A; IV, inverse variance; SD, standard deviation.

# Online Supplementary File 9

## Meta-regression of TBUT by mean age

Regression of Mean age on Difference in means

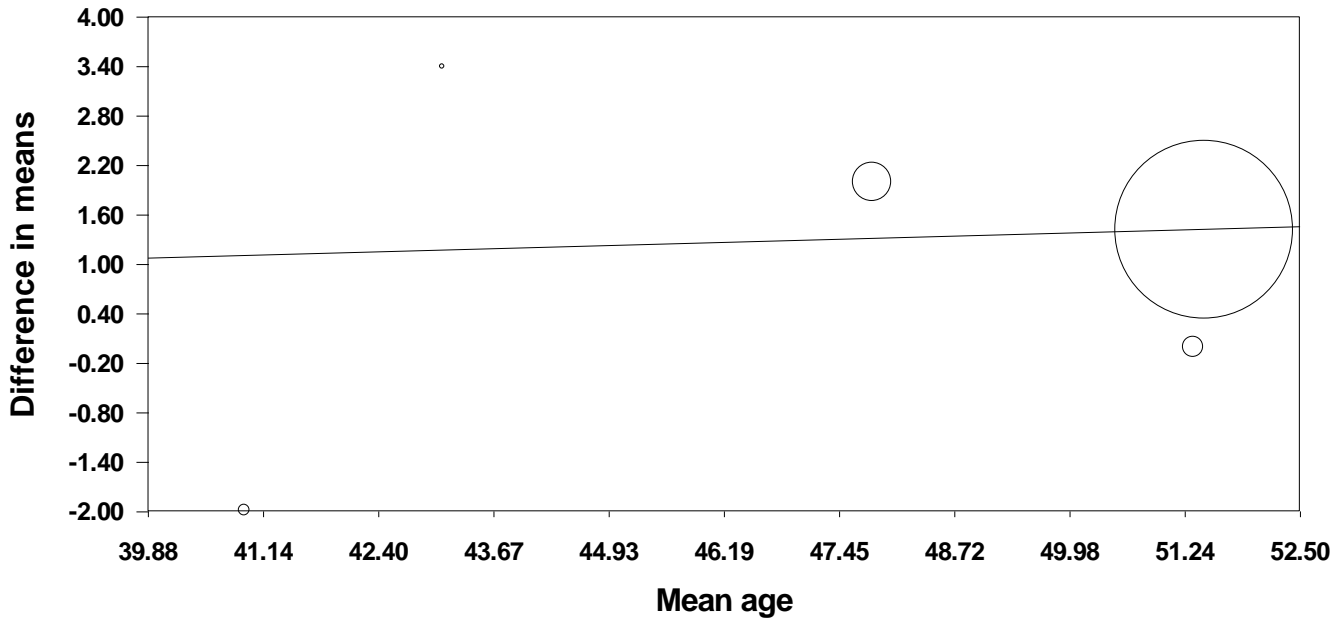

|                    | Point estimate | Standard error | Lower limit | Upper limit | Z-value  | p-Value |
|--------------------|----------------|----------------|-------------|-------------|----------|---------|
| <b>Slope</b>       | 0.03015        | 0.05490        | -0.07746    | 0.13776     | 0.54915  | 0.58290 |
| <b>Intercept</b>   | -0.12897       | 2.81383        | -5.64398    | 5.38604     | -0.04583 | 0.96344 |
| <b>Tau-squared</b> | 1.39847        |                |             |             |          |         |

|                 | Q        | df      | p-value |
|-----------------|----------|---------|---------|
| <b>Model</b>    | 0.30157  | 1.00000 | 0.58290 |
| <b>Residual</b> | 28.36159 | 3.00000 | 0.00000 |
| <b>Total</b>    | 28.66316 | 4.00000 | 0.00001 |

# Online Supplementary File 10

## Sensitivity analysis of TBUT

### In random-effects model

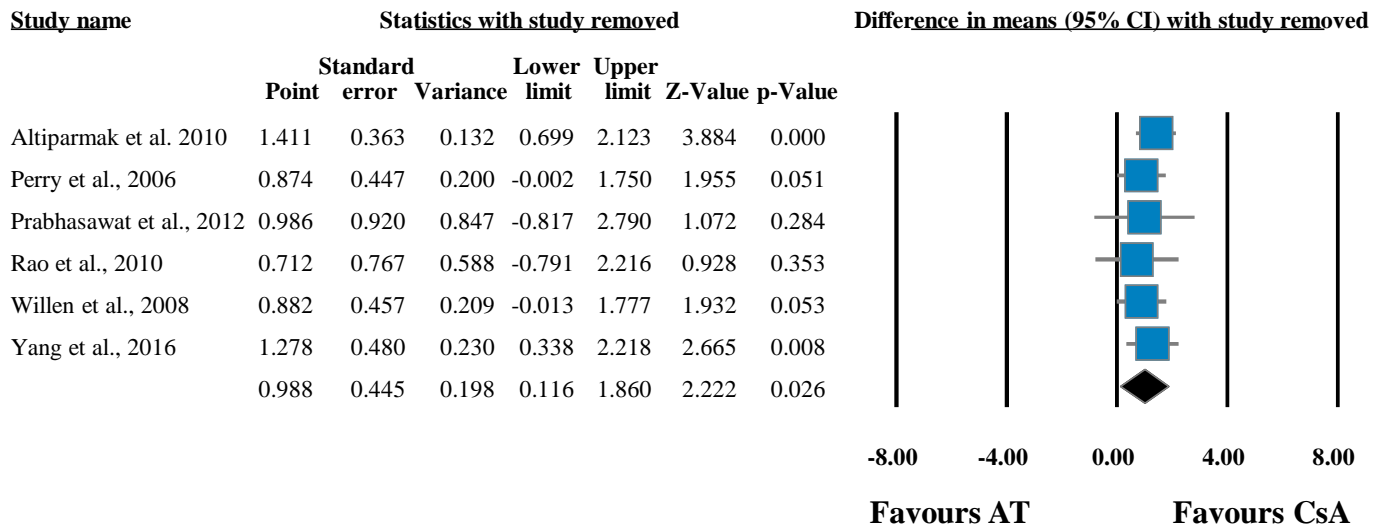

AT, artificial tears; CI, confidence interval; CsA, cyclosporine A.



# Online Supplementary File 11

## Small study bias of TBUT

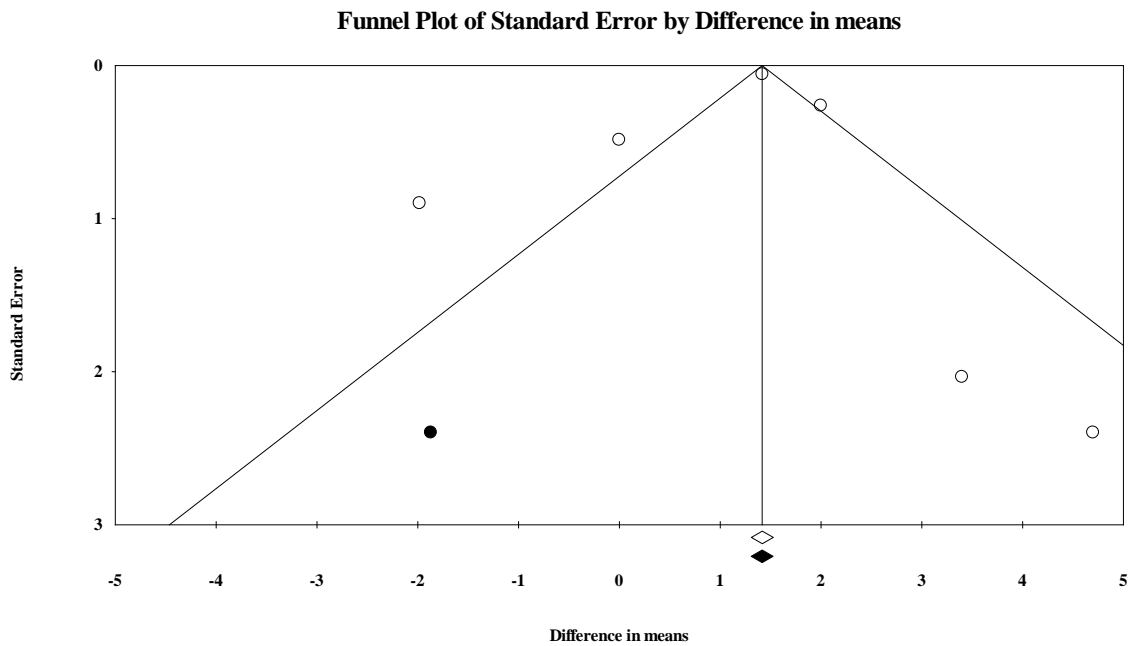

### Egger's regression intercept

|                            |          |
|----------------------------|----------|
| Intercept                  | -0.52007 |
| Standard error             | 1.35233  |
| 95% lower limit (2-tailed) | -4.27472 |
| 95% upper limit (2-tailed) | 3.23459  |
| t-value                    | 0.38457  |
| df                         | 4.00000  |
| P-value (1-tailed)         | 0.36006  |
| P-value (2-tailed)         | 0.72013  |

**Online Supplementary File 12-16**  
**Further analysis of Schirmer's test**

# Online Supplementary File 12

## Subset analysis of Schirmer's test score by treatment duration

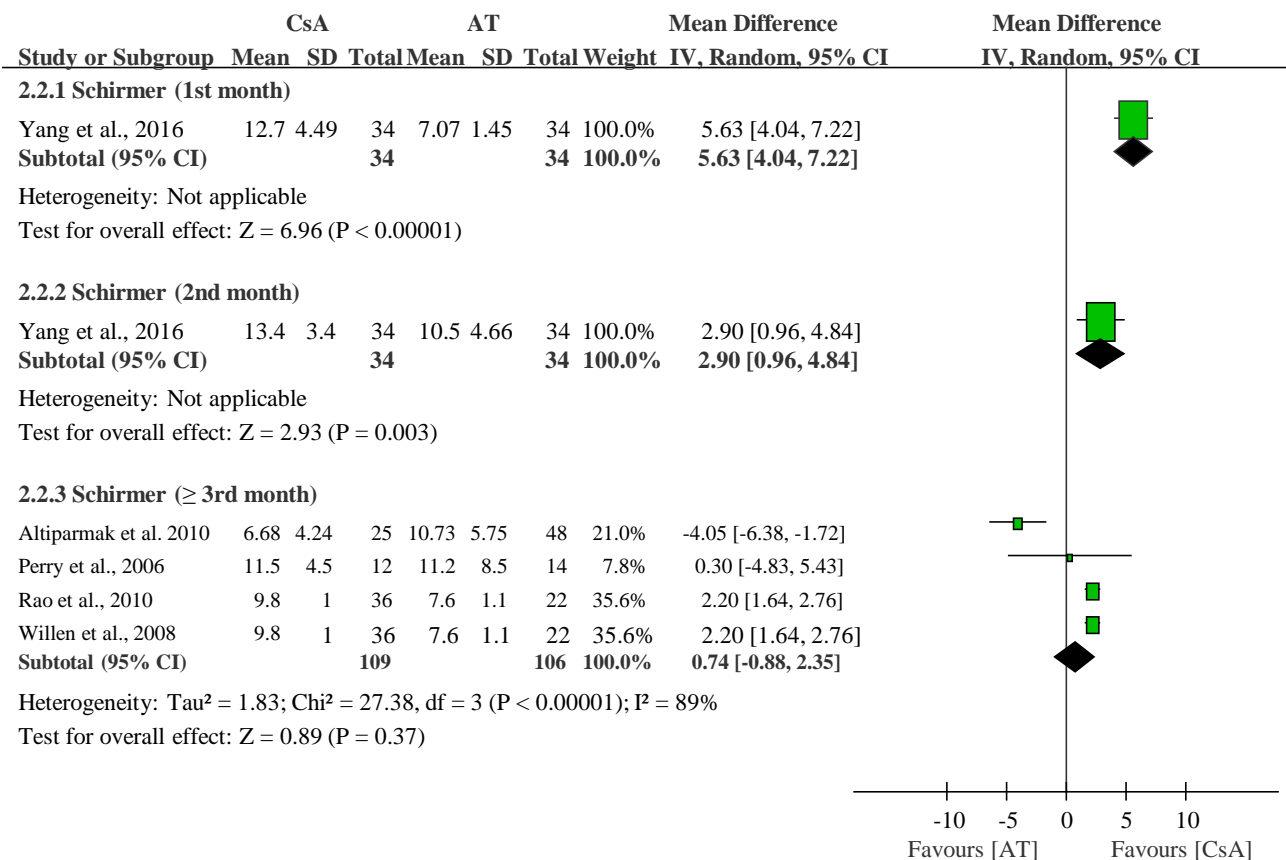

AT, artificial tears; CI, confidence interval; CsA, cyclosporine A; IV, inverse variance; SD, standard deviation.

# Online Supplementary File 13

## Subset analysis of Schirmer's test score by type of test

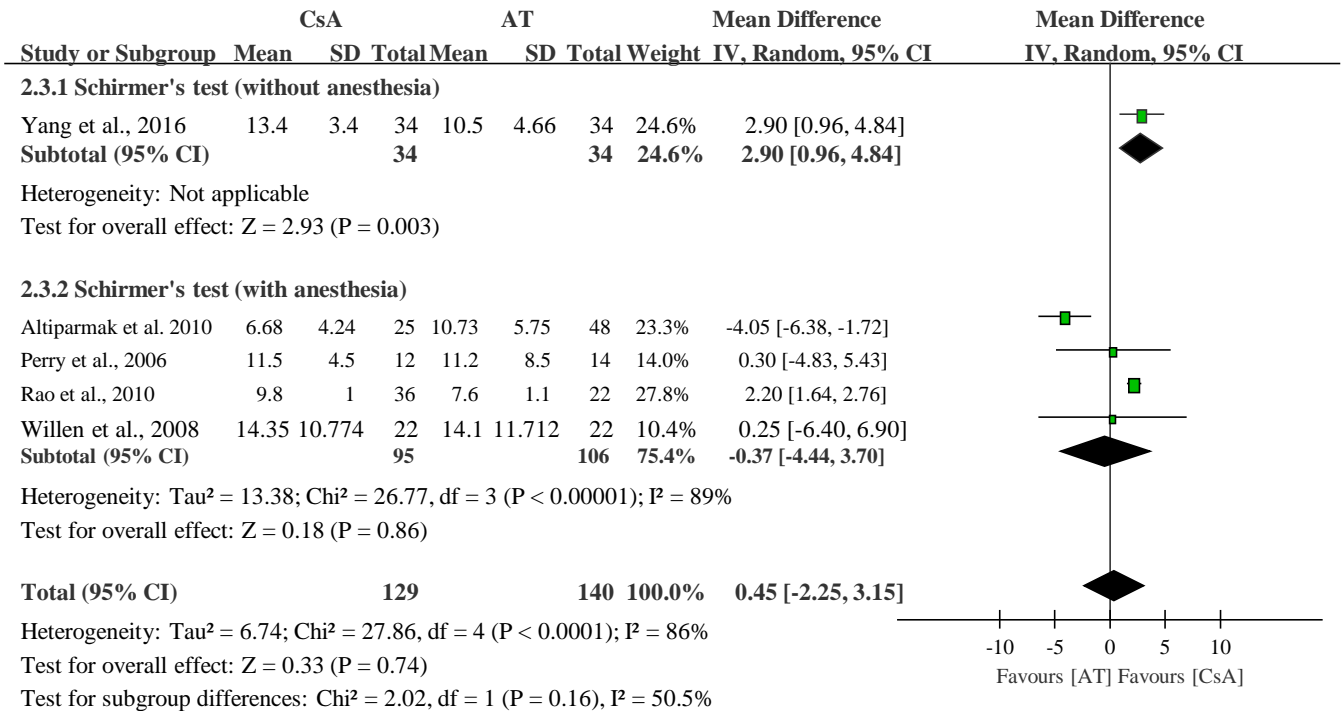

AT, artificial tears; CI, confidence interval; CsA, cyclosporine A; IV, inverse variance; SD, standard deviation.

# Online Supplementary File 14

## Subset analysis of Schirmer's test score by regimen

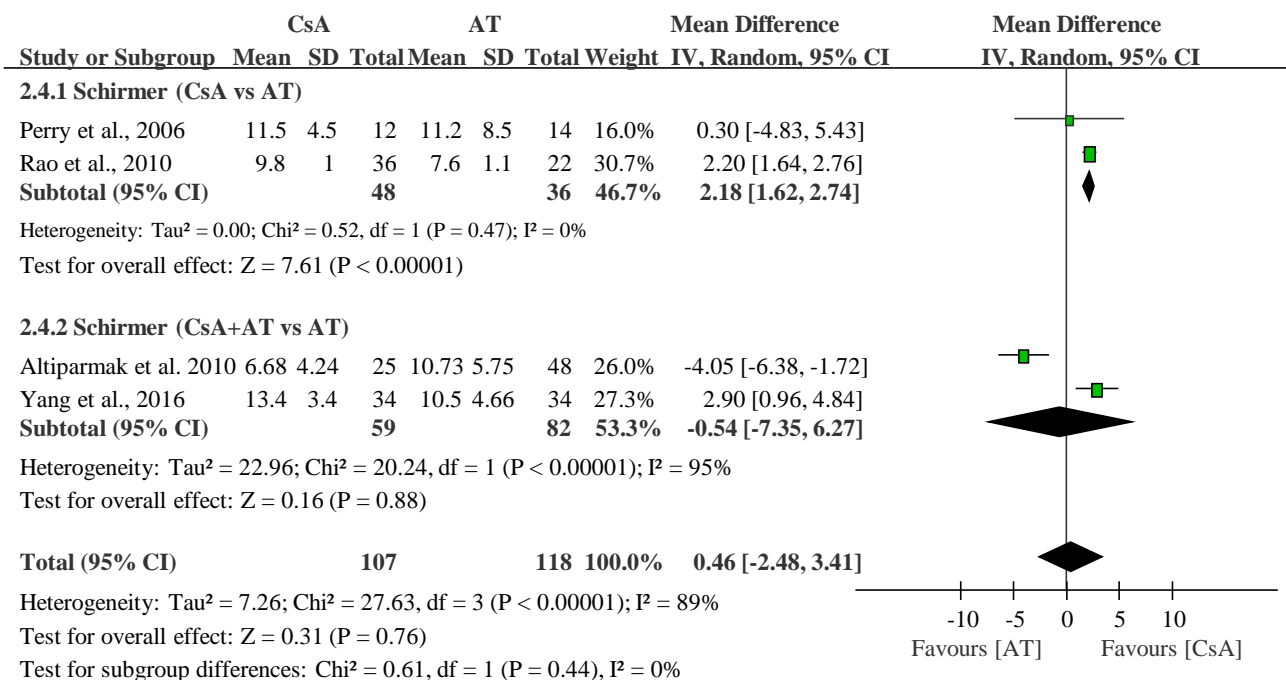

AT, artificial tears; CI, confidence interval; CsA, cyclosporine A; IV, inverse variance; SD, standard deviation.

# Online Supplementary File 15

## Meta-regression of Schirmer's test score by mean age

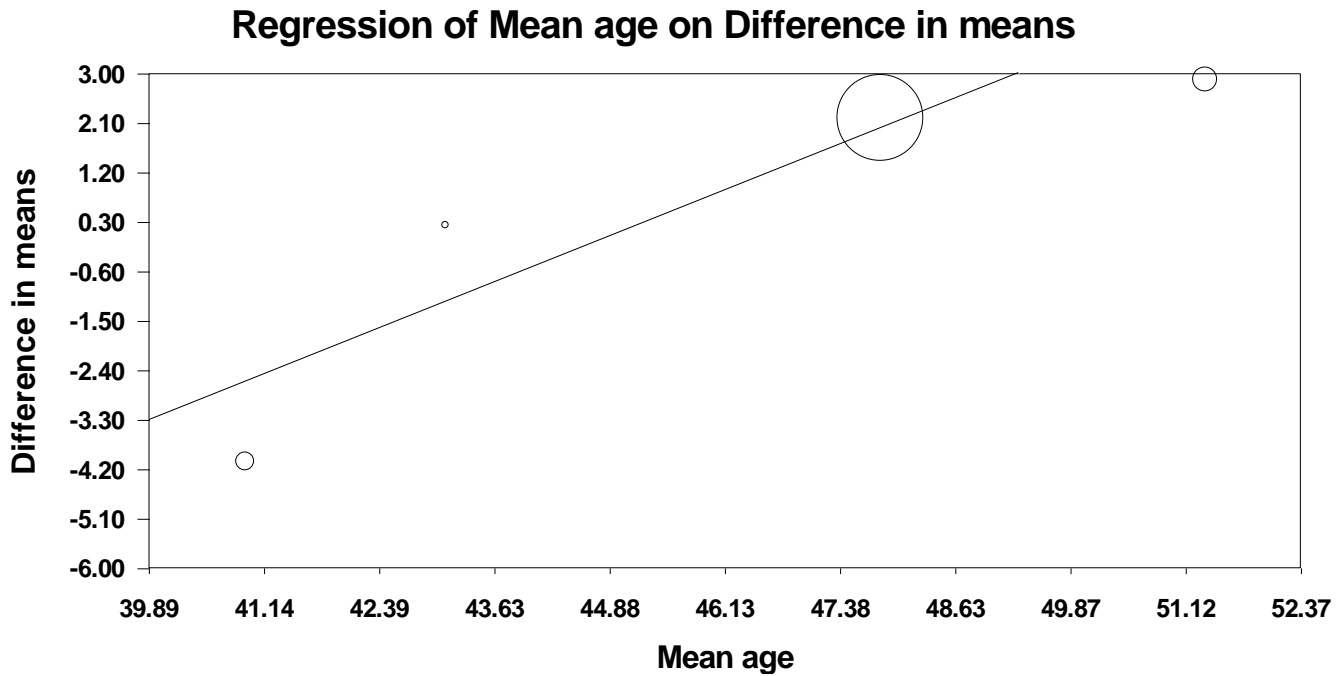

|                    | Point estimate | Standard error | Lower limit | Upper limit | Z-value  | p-Value |
|--------------------|----------------|----------------|-------------|-------------|----------|---------|
| <b>Slope</b>       | 0.67066        | 0.15364        | 0.36953     | 0.97178     | 4.36520  | 0.00001 |
| <b>Intercept</b>   | -30.04324      | 7.34126        | -44.43184   | -15.65464   | -4.09238 | 0.00004 |
| <b>Tau-squared</b> | 0.86348        |                |             |             |          |         |

|                 | Q        | df      | p-value |
|-----------------|----------|---------|---------|
| <b>Model</b>    | 19.05495 | 1.00000 | 0.00001 |
| <b>Residual</b> | 4.05734  | 2.00000 | 0.13151 |
| <b>Total</b>    | 23.11229 | 3.00000 | 0.00004 |

# Online Supplementary File 16

## Small study bias of Schirmer's test score

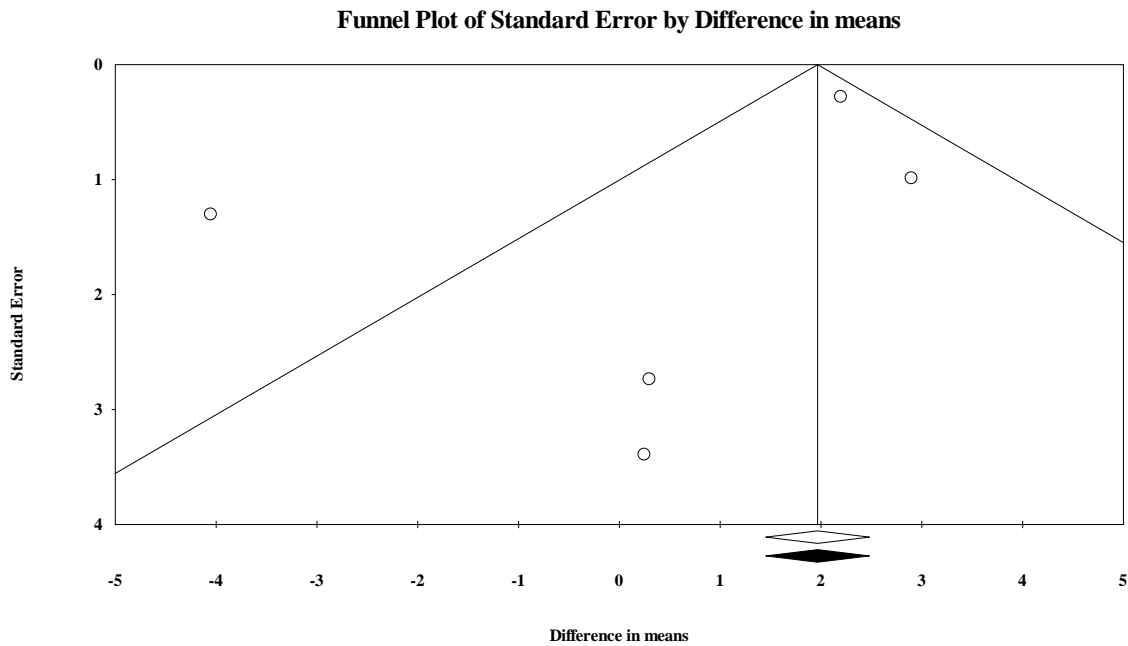

### Egger's regression intercept

|                            |          |
|----------------------------|----------|
| Intercept                  | -1.56959 |
| Standard error             | 1.51218  |
| 95% lower limit (2-tailed) | -6.38204 |
| 95% upper limit (2-tailed) | 3.24285  |
| t-value                    | 1.03796  |
| df                         | 3.00000  |
| P-value (1-tailed)         | 0.18780  |
| P-value (2-tailed)         | 0.37560  |
